# Supplementary material for: Hydrogen-Generating Silica Material Prevents UVA-Ray-Induced Cellular Oxidative Stress, Cell Death, Collagen Loss and Melanogenesis in Human Cells and 3D Skin Equivalents
Source: PubMed Central journal article supplement (PMC7827282; doi:10.3390/antiox10010076), 2021-01-08
Supplement: antioxidants-10-00076-s001.pdf [file antioxidants-10-00076-s001.pdf]

Article

# Hydrogen-generating silica material prevents UVA-ray-induced cellular oxidative stress, cell death, collagen loss and melanogenesis in human cells and 3D-skin equivalents

Supplemental data

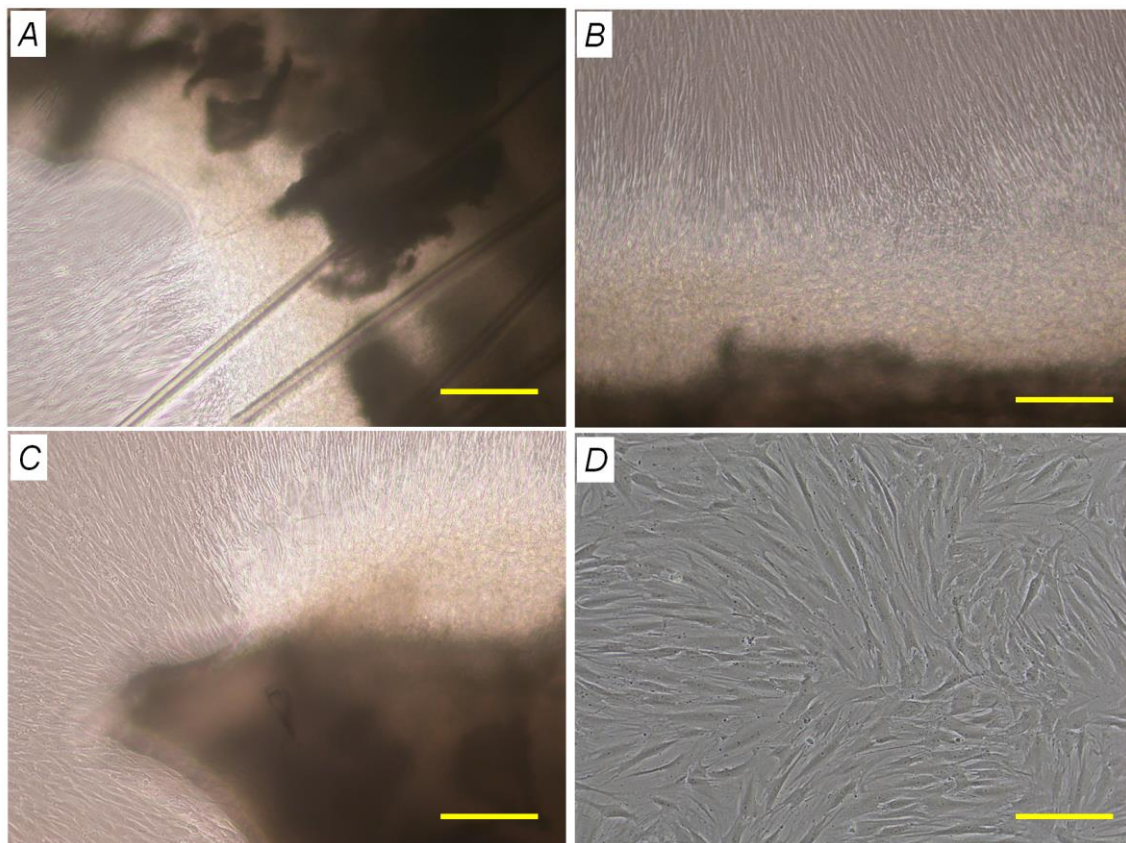

Supplemental Figure 1. Primarily cultivated HGFs

Human gingival tissue was minced to small fragments and then cultivated with the maintenance medium for 7-10 days as described in materials and methods. A – C, HGFs were migrated from the fragments and proliferated after 7-10 days cultivation. Scale bars indicate 100  $\mu\text{m}$ . D, Cultivated HGFs at passage 12. Scale bar indicates 25  $\mu\text{m}$ .
